# Supplementary material for: Synthesis of Silver Nanoparticles-Modified Graphitic Carbon Nitride Nanosheets for Highly Efficient Photocatalytic Hydrogen Peroxide Evolution
Source: MDPI journal article supplement (doi:10.3390/molecules27175535), 2022-08-28
Supplement: s1 [file s1]

Supplementary Material

# Synthesis of Silver Nanoparticles-Modified Graphitic Carbon Nitride Nanosheets for Highly Efficient Photocatalytic Hydrogen Peroxide Evolution

Jixiang Hou <sup>†</sup>, Xu Zhang <sup>†</sup>, Kaiwen Wang, Peijie Ma, Hanwen Hu, Xiyuan Zhou, and Kun Zheng <sup>\*</sup>

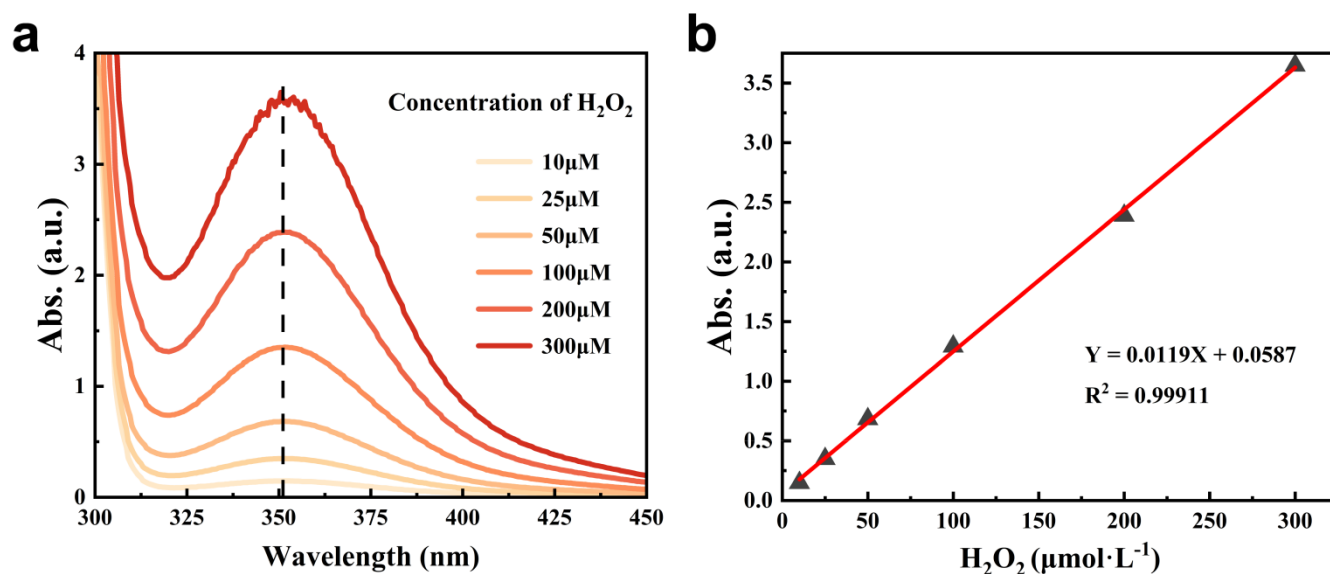

**Figure S1.** (a) the UV-vis absorption intensity of different H<sub>2</sub>O<sub>2</sub> concentrations by iodimetry; (b) the standard curve of H<sub>2</sub>O<sub>2</sub>.

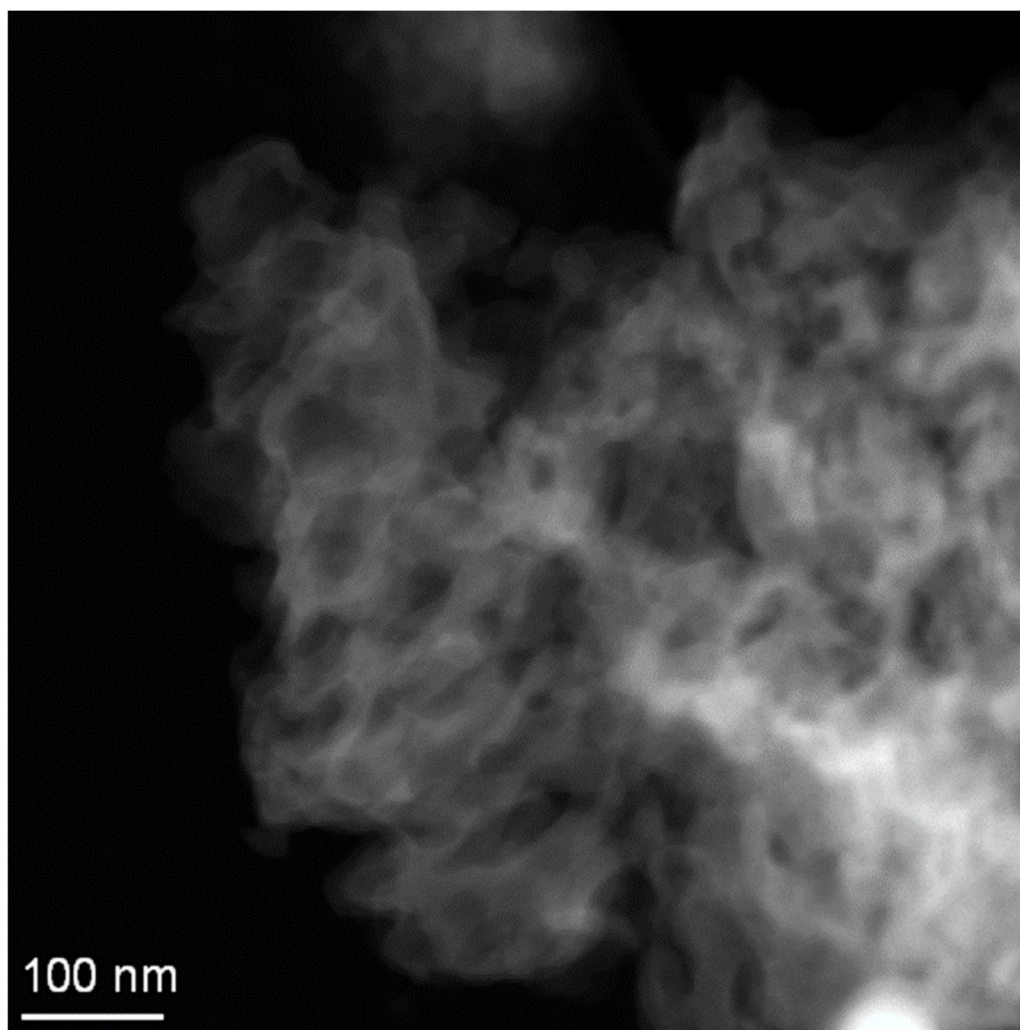

**Figure S2.** the low magnified TEM image of CNNS.

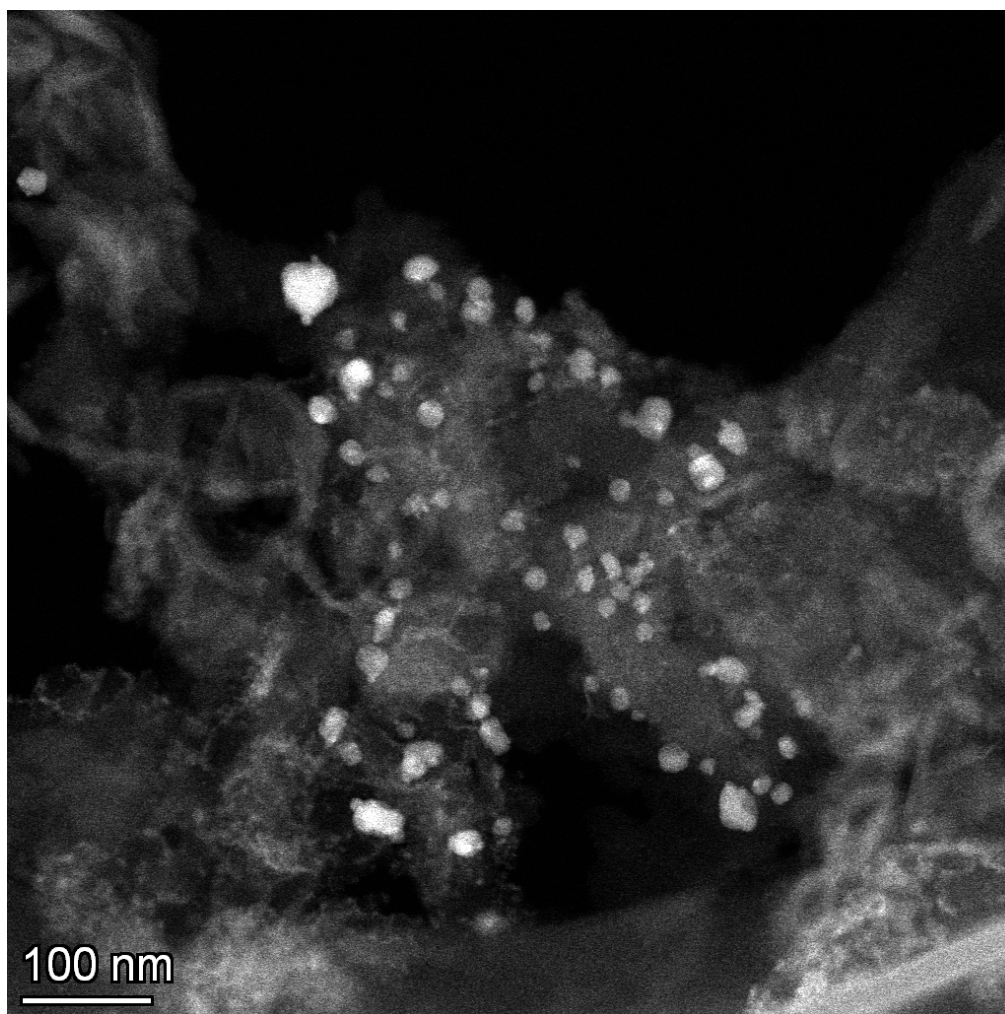

Figure S3. the low magnified TEM image of Ag@CNNS.

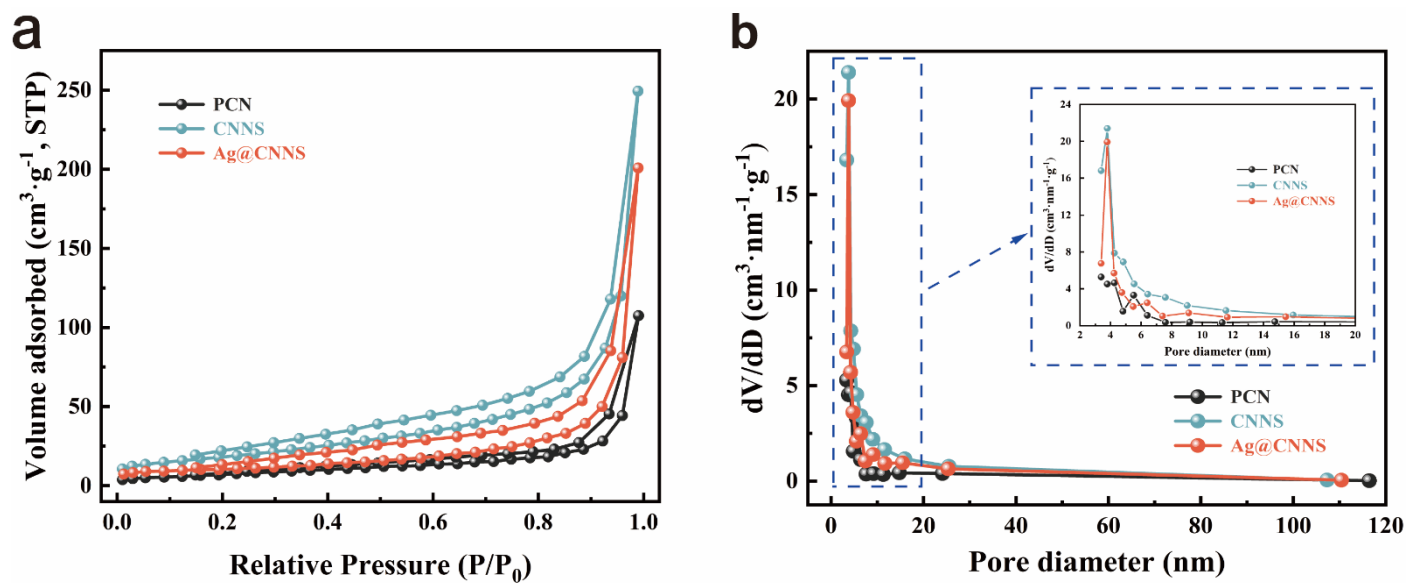

Figure S4. (a) N<sub>2</sub> adsorption-desorption isotherms and (b) pore size distribution curves of PCN, CNNS, and Ag@CNNS.

**Table S1.** BET surface areas of PCN, CNNS, and Ag@CNNS.

| Photocatalysts | BET surface area ( $\text{m}^2\cdot\text{g}^{-1}$ ) |
|----------------|-----------------------------------------------------|
| PCN            | 27.836                                              |
| CNNS           | 67.716                                              |
| Ag@CNNS        | 37.736                                              |

As shown in Figure S4a, all samples exhibited a type IV  $\text{N}_2$  adsorption-desorption isotherm and a type H3 hysteresis loop. Table S1 further summarized the specific surface area of the samples in the following order: CNNS ( $67.716 \text{ m}^2/\text{g}$ ) > Ag@CNNS ( $37.736 \text{ m}^2/\text{g}$ ) > PCN ( $27.836 \text{ m}^2/\text{g}$ ). The CNNS had the largest specific surface area, indicating that PCN was successfully exfoliated into g- $\text{C}_3\text{N}_4$  nanosheets by thermal etching and ultrasonic etching. Compared with CNNS, the specific surface area of Ag@CNNS was slightly reduced, because Ag nanoparticles on the surface blocked pores of CNNS, which also reflected the effective loading of Ag particles on CNNS. Meanwhile, Figure S4b further showed the pore size distribution of the samples. In contrast, CNNS and Ag@CNNS had a more wider pore size distribution than PCN, presenting a pore size distribution curve centered at 4 nm.

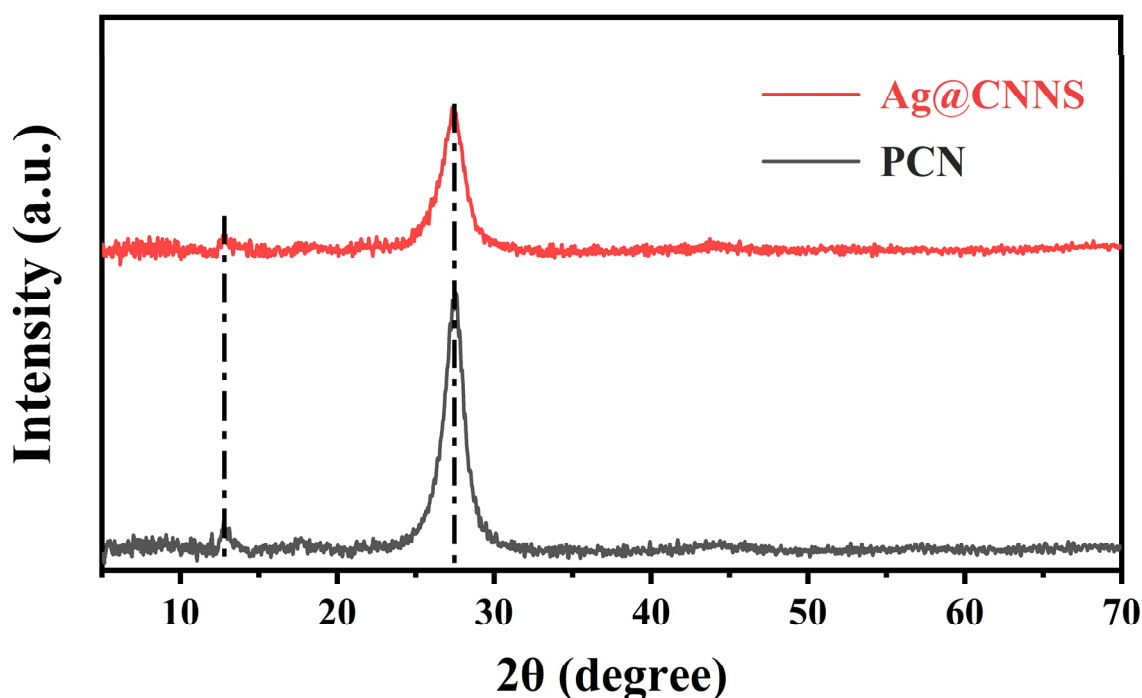**Figure S5.** XRD patterns of PCN and Ag@CNNS.



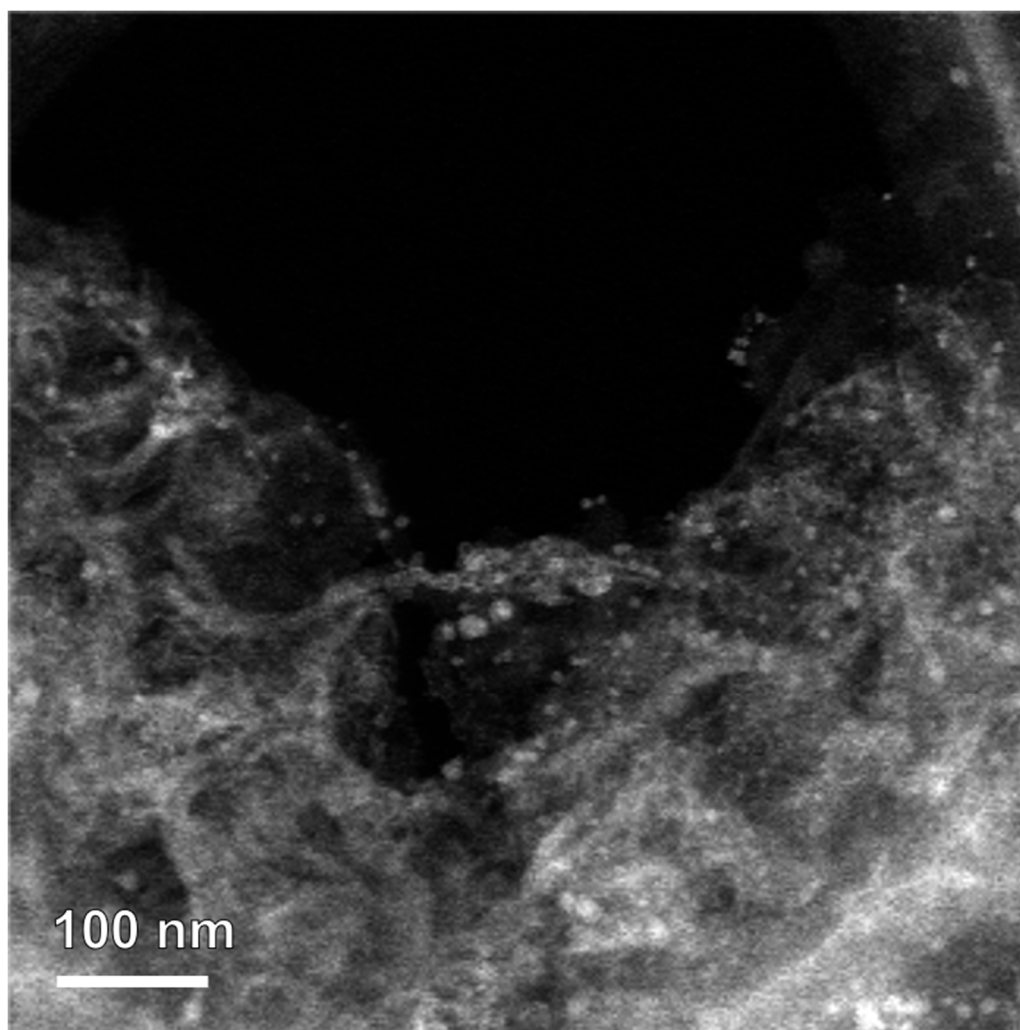

**Figure S6.** TEM image of Ag@CNNS after a 5 times cycling test.

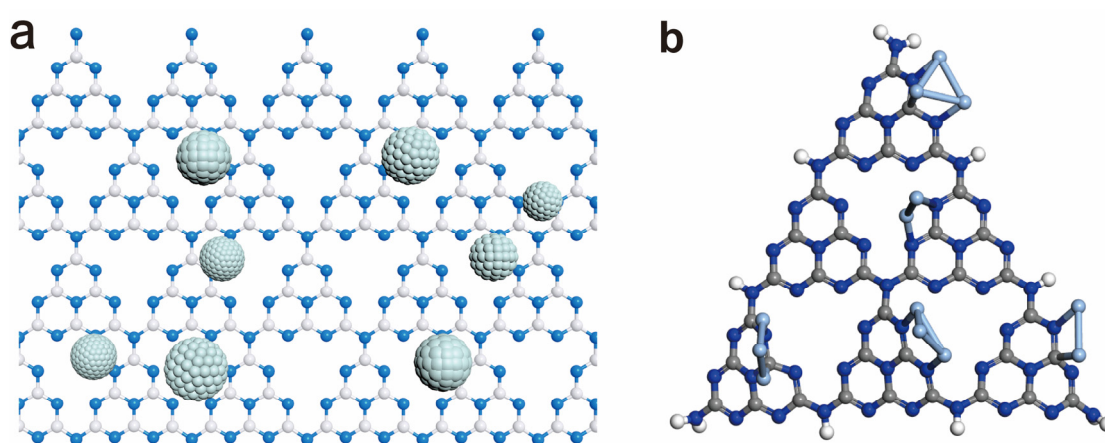

**Figure S7.** (a) schematic diagram of the Ag@CNNS; (b) local coordination structure of Ag nanoparticles.
